# Supplementary material for: Somatic genetic aberrations in benign breast disease and the risk of subsequent breast cancer
Source: PubMed Central journal article supplement (PMC7293275; doi:10.1038/s41523-020-0165-z), 2020-06-12
Supplement: 41523_2020_165_MOESM1_ESM.pdf [file 41523_2020_165_MOESM1_ESM.pdf]

# Somatic Genetic Aberrations in Benign Breast Disease and the Risk of Subsequent Breast Cancer

Zexian Zeng<sup>1,2</sup>, Andy Vo<sup>3</sup>, Xiaoyu Li<sup>4</sup>, Ali Shidfar<sup>5</sup>, Paulette Saldana<sup>5</sup>, Luis Blanco<sup>6</sup>, Xiaoling Xuei<sup>7</sup>, Yuan Luo<sup>1\*</sup>, Seema A. Khan<sup>5\*</sup>, Susan E. Clare<sup>5\*</sup>

## Supplementary Materials and Methods

Supplementary Table 1: **List of features used in the predictive model for somatic mutation identification.** ‘Allele frequency’ is the mutation allele frequency, ‘Ref depth’ is the read depth of the reference allele, ‘Fre cohort’ is the number of appearances of this mutation in the cohort. SNP common is a binary variable indicating that the mutation appears in the database of dbSNP after removing those flagged SNPs (SNPs < 1% minor allele frequency (MAF) (or unknown), mapping only once to reference assembly, flagged in dbSNP as "clinically associated"). ‘COSMIC’ is a binary variable indicating whether the mutation appears in the COSMIC version 80. The other features were derived from functional annotations from functional annotation tools.

|                      |                         |                          |
|----------------------|-------------------------|--------------------------|
| Allele frequency     | Polyphen2 HVAR pred     | MetaLR score             |
| Ref depth            | LRT score               | MetaLR pred              |
| Freq cohort          | LRT pred                | VEST3 score              |
| SNP common           | Mutation Taster score   | CADD raw                 |
| ExAC                 | Mutation Taster pred    | CADD phred               |
| COSMIC               | Mutation Assessor score | GERP score               |
| SIFT score           | Mutation Assessor pred  | phyloP20 way mammalian   |
| SIFT pred            | FATHMM score            | phyloP100 way vertebrate |
| Polyphen2 HDIV score | FATHMM pred             | SiPhy 29 way logOdds     |
| Polyphen2 HDIV pred  | MetaSVM score           |                          |
| Polyphen2 HVAR score | MetaSVM pred            |                          |

Supplementary Table 2: **The number of mutations in the train set and test set and the prediction performance achieved in the multiple layer perceptron (MLP).** The germline variants were treated as predictive negative and somatic mutations were treated as predictive positive. Using tuned multiple layer perceptron model to predict mutations in the holdout test set, the AUC score, precision, recall, and F-Measure are reported.

|            | Train Set | Test Set |
|------------|-----------|----------|
| Germline   | 10464     | 3315     |
| Somatic    | 2817      | 1115     |
| <b>MLP</b> |           |          |

|             |           |        |          |
|-------------|-----------|--------|----------|
| <b>AUC</b>  | Precision | Recall | F1-score |
| <b>0.98</b> | 0.95      | 0.98   | 0.96     |

Supplementary Table 3: **The number of missense mutations within MUC17 that resulted in the gain or loss of either serine or threonine residues.** While 8.7% of missense mutations in MUC17 would be predicted to result in the loss of serine, 16.8% in the loss of threonine, 14.2% in the gain of serine and 17.8% in the gain of threonine, there was no significant difference in between cases and controls. Pearson's Chi-squared tests were performed for categorical variables.

|                | <b>Serine lose</b> | <b>Serine gain</b> | <b>Threonine lose</b> | <b>Threonine gain</b> |
|----------------|--------------------|--------------------|-----------------------|-----------------------|
| <b>Case</b>    | 19 (10.9%)         | 23 (13.2%)         | 31 (17.8%)            | 25 (14.4%)            |
| <b>Control</b> | 8 (5.9%)           | 21 (15.5%)         | 21 (15.5%)            | 30 (22.2%)            |
| <b>Sum</b>     | 27 (8.7%)          | 44 (14.2%)         | 52 (16.8%)            | 55 (17.8%)            |
| <b>P-value</b> | 0.12               | 0.56               | 0.60                  | 0.07                  |

Supplementary Table 4: **The ten most frequently mutated genes shared between the BBB of cases and their tumors.** TSG=tumor suppressor \*OG=oncogene

|                      | <b>Description</b>                       | <b>N</b> | <b>Consensus</b> |
|----------------------|------------------------------------------|----------|------------------|
| <b><i>FAT1</i></b>   | FAT Atypical Cadherin 1                  | 8        | TSG              |
| <b><i>EPG5</i></b>   | Ectopic P-granules autophagy protein 5   | 7        |                  |
| <b><i>BZRAP1</i></b> | TSPO associated protein 1                | 6        |                  |
| <b><i>CTNNA2</i></b> | Catenin Alpha2                           | 6        | OG, TSG          |
| <b><i>MYH11</i></b>  | Myosin Heavy chain 11                    | 6        |                  |
| <b><i>ABCA13</i></b> | ATP binding cassette subfamily A         | 5        |                  |
| <b><i>ATR</i></b>    | ATR Serine/Threonine Kinase              | 5        | TSG              |
| <b><i>DNAH14</i></b> | Dynein axonemal heavy chain 14           | 5        |                  |
| <b><i>ETAA1</i></b>  | ETAA1 activator of ATR kinase            | 5        |                  |
| <b><i>FBXL18</i></b> | F-box and leucine rich repeat protein 18 | 5        |                  |

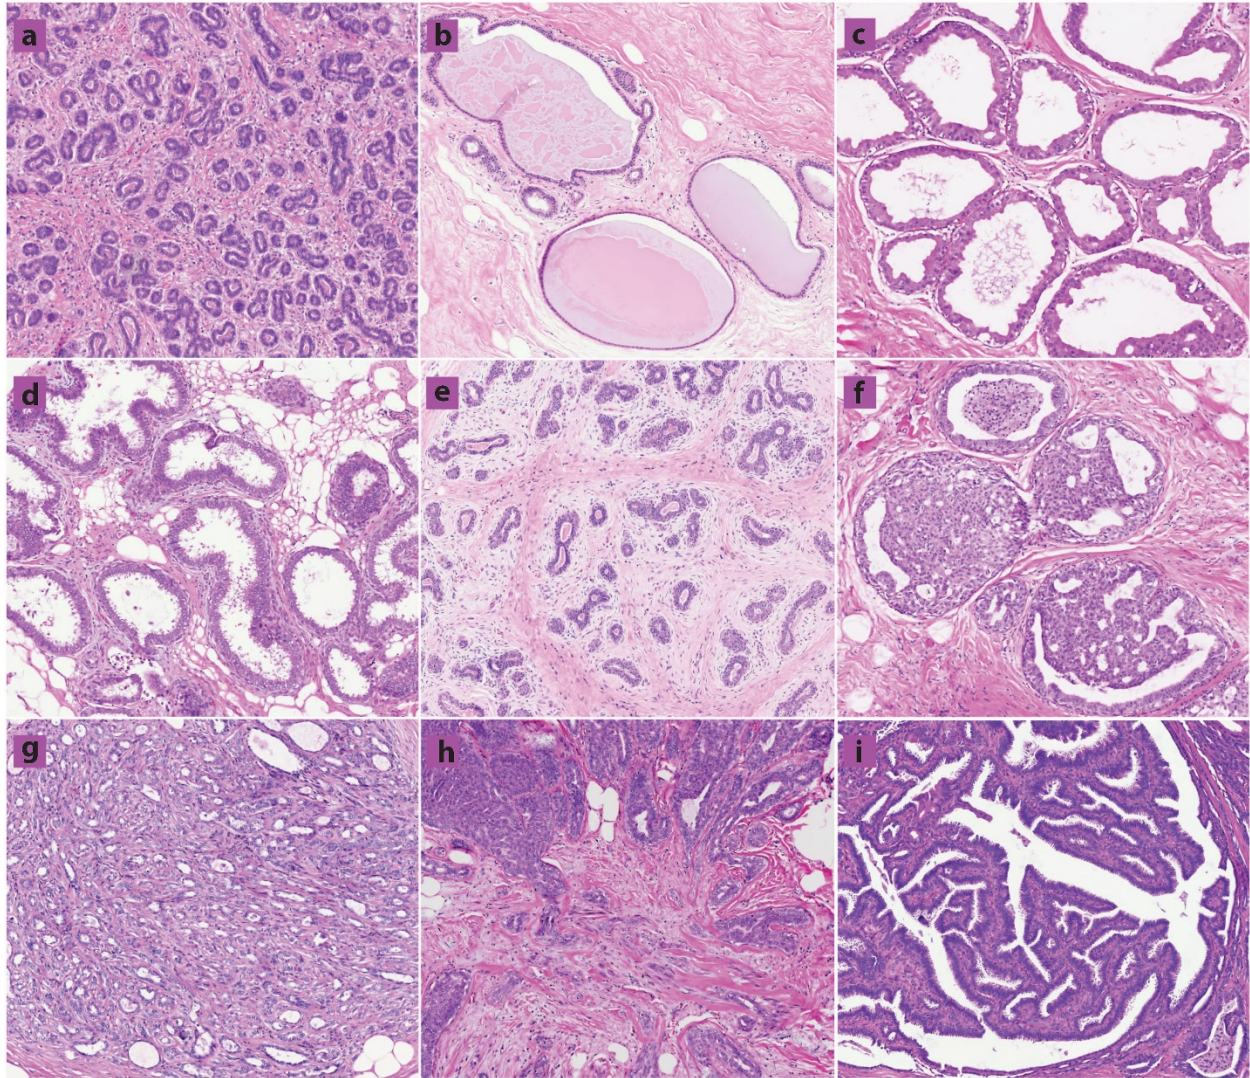

Supplementary Figure 1: **Examples of benign non-atypical breast lesions.** Nonproliferative lesions included: (a) adenosis – lobule with increased number of acini with open lumens, (b) cysts – dilated ducts lined by flattened epithelial cells, (c) apocrine metaplasia – cystically dilated ducts lined by epithelial cells with abundant granular eosinophilic cytoplasm and round nuclei, (d) columnar cell change – dilated glands lined by tall cells with ovoid nuclei perpendicular to the basement membrane, and (e) fibroadenoma without epithelial hyperplasia – biphasic proliferation of benign epithelium and surrounding intralobular stroma. Proliferative lesions included: (f) florid ductal hyperplasia without atypia – distended ducts lined by increased numbers of a mixed population of luminal and myoepithelial cells with irregular slit like fenestrations, (g) sclerosing adenosis – enlarged terminal duct lobular unit with increased number of acini that are compressed and distorted by dense stroma, (h) radial scar – central nidus of hyalinized stroma with entrapped glands surrounded by long radiating projections containing epithelium with varying degrees of cyst formation and hyperplasia, and (i) papilloma – dilated duct with multiple branching fibrovascular cores lined by myoepithelial and epithelial cells.

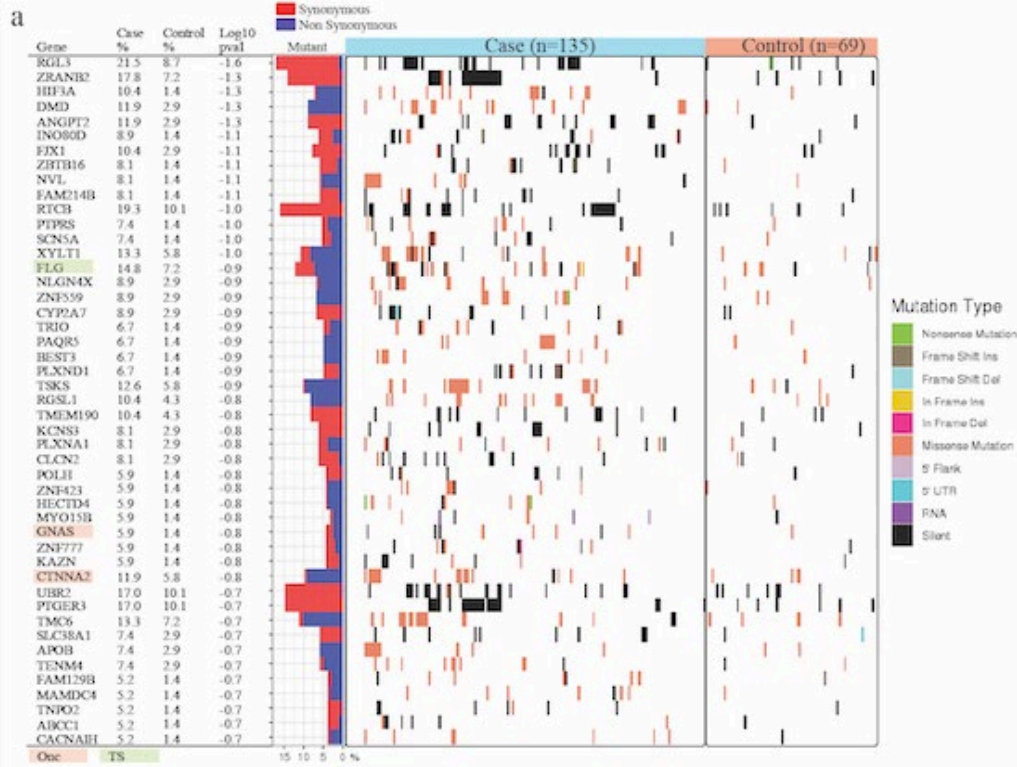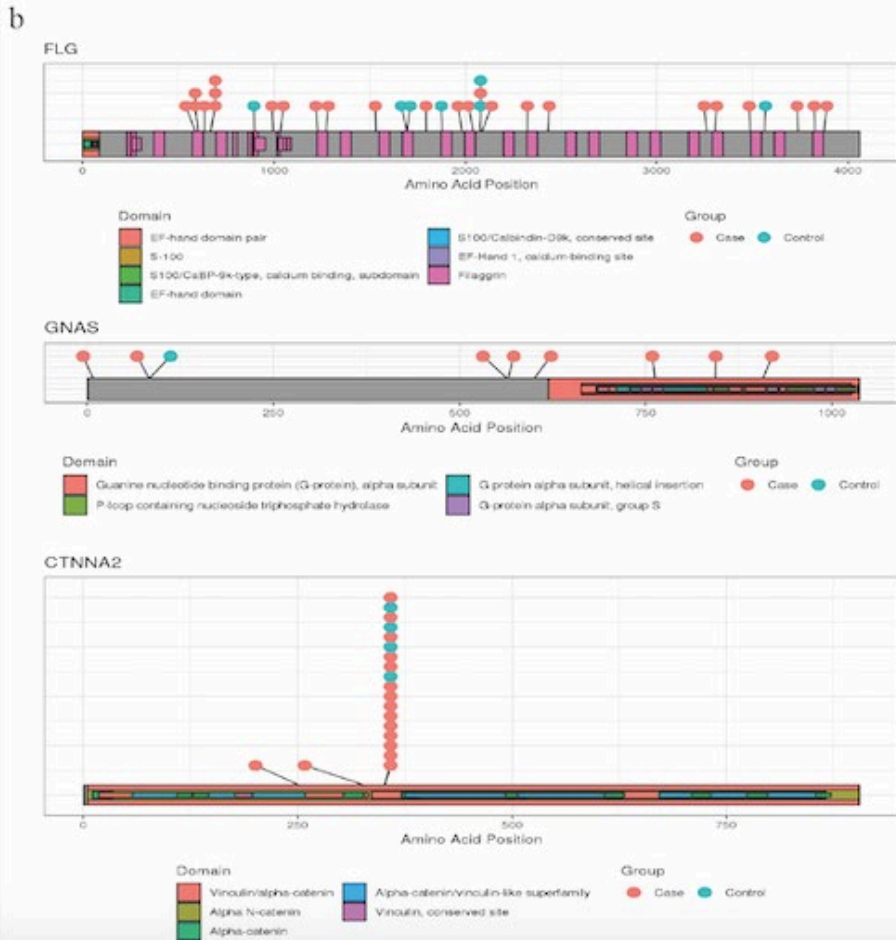

Supplementary Figure 2: **Genetic aberrations that distinguish case and control and mutational positions.** **a.** For each gene, the percentage of mutated individuals in the case and control were shown. Onc are known oncogenes; TS are known tumor suppressor genes. The p-values were derived using the case/control as output and the mutated individual as inputs in logistic regression. The middle panel shows the synonymous versus nonsynonymous rate. In the right panel, each column is an individual, and the color represents the mutation class. **b.** Position of mutational alterations in the protein structure of FLG, GNAS, and CTNNA2.

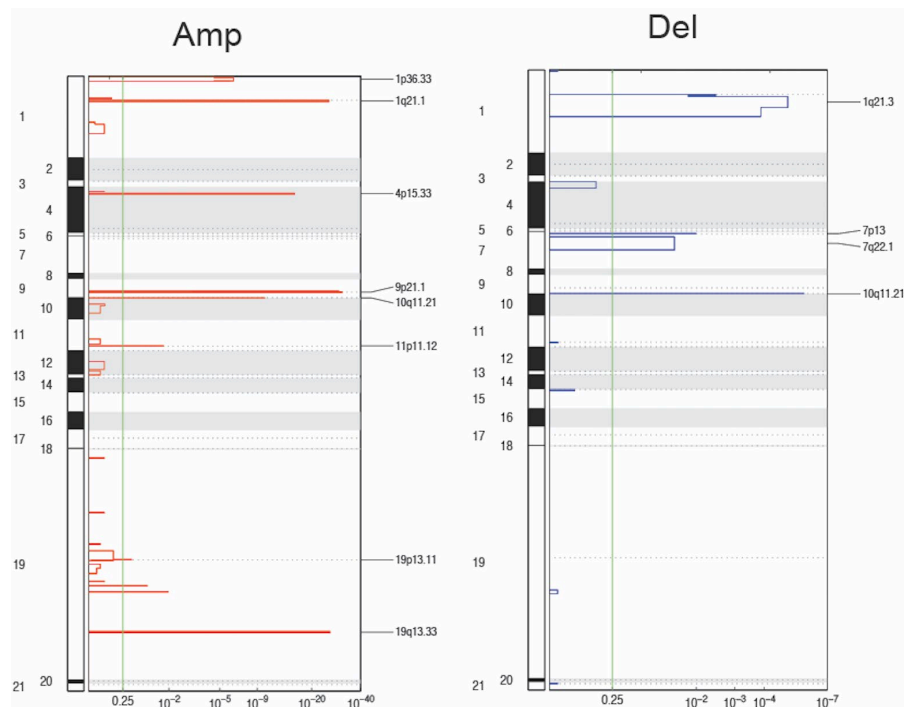

Supplementary Figure 3: **Genome wide amplifications and deletions among the 20 cases with matched normal DNA. Left: amplification. Right, deletion.** The results were generated by VarScan2 and GISTIC2.

### Pathology/Histology

Benign breast diseases were classified based on previously established categories<sup>1-3</sup> according to subsequent risk of developing breast cancer as follows: (1) nonproliferative, (2) proliferative without atypia, or (3) proliferative with atypia. Nonproliferative lesions included cases with a diagnosis of adenosis, cysts, apocrine metaplasia, fibroadenoma without epithelial hyperplasia, columnar cell change, and mild ductal hyperplasia of the usual type (Supplementary Figure 1, a-e). Proliferative lesions without atypia included cases with a diagnosis of moderate to florid ductal hyperplasia of the usual type, papilloma, sclerosing adenosis, and complex sclerosing

lesions including radial scar (Supplementary Figure 1, f-i). Proliferative lesions with atypia included cases with a diagnosis of atypical ductal hyperplasia (ADH) and atypical lobular hyperplasia (ALH).

### **Library construction and sequencing**

Ten 10-micron sections per sample were cut from formalin-fixed, paraffin-embedded (FFPE) tissue blocks, and the matched areas of interest isolated by laser capture microdissection (LCM). In detail, we took slides to Center for Advanced Microscopy (CAM) and used Zeiss Palm microscope to micro-dissect and collect areas of interest in a 500 $\mu$ l adhesive cap (AdhesiceCap 500 opaque -Zeiss order number 415190-9201-000). Total genomic DNA was extracted from the LCM samples, using Qiagen AllPrep DNA/RNA FFPE kit (Cat. No. 80234). DNA concentration was measured by Nanodrop. Samples used for this study yielded >300ng of DNA. The concentration and quality of gDNA samples were first assessed using Agilent 4200 TapeStation. Then 100-200 nanograms of DNA per sample were used to prepare single-indexed cDNA library using SureSelectXT Human All Exon V6 (58Mb) (Agilent). The resulting libraries were assessed for its quantity and size distribution using Qubit and Agilent 2100 Bioanalyzer. Two hundred picomolar per liter pooled libraries were utilized per flow cell for clustering amplification on cBot using HiSeq 3000/4000 PE Cluster Kit and sequenced with 2 $\times$ 75bp paired-end configuration on HiSeq4000 (Illumina) using HiSeq 3000/4000 PE SBS Kit. A Phred quality score (Q score) was used to measure the quality of sequencing. More than 90% of the sequencing reads reached Q30 (99.9% base call accuracy). With the goal of sequencing at 100X, the final average sequencing depth was 69X, and there were 80-90 million sequencing reads per sample. To note, after the first

round of sequencing, 27 samples had the coverage under 50X, and were re-sequenced for deeper coverage under the same protocol.

### **Microarray genotyping**

To evaluate the performance of called somatic mutations, a subset of samples was separately LCM dissected, and the extracted DNA were genotyped using Infinium Exome-24 Kit, which covers 240,000 markers in a catalog of exome variants. Of note, the quality control sample had a call rate of 99.34%. During the QC period, no samples failed restoration. For quality control, three samples were repeatedly genotyped twice, and R-square rates were calculated for the overlap. The reported R-square rates are 98.86%, 99.29%, and 99.39%. The high overlap rates indicate a high stability of calling variants from our DNA. Genotyped variants from the 17 samples were mapped to genomic assemblies (hg19). To note, only the calls with GCScore larger than 0.15 were retained. The coordinates that appear both in genotype array and somatic mutations called by MuTect2, VarScan2, or VarDict were retrieved. The allele frequencies derived from both technologies were compared. The overlap number between array and MuTect2, VarScan2, VarDict are 384, 963, and 124,511 respectively.

### **Classification model for somatic mutations**

Our initial objective was to develop and test a predictive model for somatic mutation identification. MuTect2 is known as one of the most reliable and sensitive cancer somatic mutation callers.<sup>4</sup> We have learned that mutations identified by MuTect2 have higher accuracy than the other callers. In this study, MuTect2 was used to call somatic mutations from the 26 benign biopsies and matched normal germline DNA. To reduce the false positive call rates, the following mutations were labeled

as germline variants: those that appear in dbSNP with ANNOVAR<sup>5</sup> index files (after removing those SNPs < 1% minor allele frequency (or unknown), or mapping only once to reference assembly, or flagged in dbSnp as "clinically associated") and not in COSMIC database (version 80). The called mutations from these 26 matched samples were used as the gold standard for the predictive model training and testing. The 28177 called mutations were randomly split to cross-validation set and holdout test set based on a 7:3 ratio.

Tools predicting somatic mutations for germline DNA free samples have been developed. However, the developed tools attempted to predict somatic mutations in tumor-only samples. Tools that have been developed and validated using the mutations derived from tumor samples cannot be applied to benign biopsies directly, mostly due to the different feature landscapes in mutations derived from tumors and benign biopsies. For example, allele frequency derived in tumor samples are expected to be higher than allele frequencies in benign biopsies<sup>6</sup> In order to predict somatic mutations in the benign-only biopsies without matched normal DNA, in this study, we attempted to develop and evaluate a new predictive model to predict somatic mutations in benign biopsies.

In total, 31 features (Supplementary Table 1) were retrieved or developed to create the predictive model for somatic mutation identification. Multiple tools have been developed for potential pathogenicity prediction. These tools consider either the protein structure, population frequency, or evolutionary factors.<sup>7</sup> Various functional annotation or toxicity scores were derived from ANNOVAR,<sup>5</sup> COSMIC (<https://cancer.sanger.ac.uk/cosmic>), dbSNP/common (<https://www.ncbi.nlm.nih.gov>), along with intrinsic sequencing features, such as mutation allele frequency, depth of reference reads, mutation frequency in the cohort. Not all mutations were annotated in each of the database. However, missing data that appear in more than one feature



could challenge some of the classifiers (e.g. logistic regression). Considering that the features are a mix of continuous number, binary feature, and categorical variables, Multivariate Imputation by Chained Equations (MICE)<sup>8</sup> was used to impute the missing values. In detail, 20 sets of data were imputed with the iteration equal to 20. Utilizing the derived features, we evaluated multiple linear and nonlinear machine learning models for somatic mutation classification. Grid search was applied to tune each model's parameters using five-fold cross-validation on the training set. To reduce the risk of having false positives, precision was used as selection criteria for parameter tuning and model selection. Once the model was tuned, it was applied on the held-out test set for precision, recall, F-measure, and AUC score reporting. The model with the highest precision was selected as our somatic mutation predictive model. To maximize the prediction power, we evaluated multiple machine learning methods, including penalized logistic regression (LR), linear SVM, random forest classifier (RFC), gradient boosted tree (GBT), k-nearest neighbor algorithm (K-NN), SVM with rbf kernel, and multi-layer perceptron (MLP). With the parameters tuned, the models were evaluated within the holdout test. The machine learning models achieved different performances in the somatic mutation classification (Fig. 2b). The MLP model achieved the highest precision (95%) in the held-out test set, and was selected as our predictive model for somatic mutation classification (Fig. 2a). In short, MLP is a class of feedforward artificial neural network. The tuned MLP model has two layers and each layer with 10 and 5 neurons respectively. Learning rate was set as 'invscaling' and solver was set as 'lbfgs'. The 'logistic' activation function was applied in the MLP model.

### **Validate predicted somatic mutations**

We applied the tuned MLP model to predict germline variants/somatic mutations on the mutations derived from the 178 benign biopsies without matching germline DNA. In total, out of the 93,653 mutations, 38,210 were predicted to be somatic mutations. To estimate the overall accuracy of predicted somatic mutations, we randomly selected and genotyped three samples for an evaluation study. Three samples were separately LCM dissected. The extracted DNA were genotyped using Infinium Exome-24 Kit. Genotyped probes with GCSCORE larger than 0.15 from the three samples were mapped to hg19 assemblies. Overlapped coordinates were retrieved and the allele frequencies derived from both technologies were compared.

1. Rohan, T.E. & Kandel, R.A. *Breast*. In: E. L. Franco, T. E. Rohan eds. *Cancer Precursors: Epidemiology, Detection, and Prevention* (Springer-Verlag, New York, 2002).
2. Lakhani, S. R. *et al.* International Agency for Research on Cancer (IARC): WHO Classification of Tumours of the Breast 4 (IARC, Lyon, 2012).
3. Hartmann, L.C., *et al.* Benign breast disease and the risk of breast cancer. *N Engl J Med* **353**, 229-237 (2005).
4. Wang, Q., *et al.* Detecting somatic point mutations in cancer genome sequencing data: a comparison of mutation callers. *Genome medicine* **5**, 91 (2013).
5. Wang, K., Li, M. & Hakonarson, H. ANNOVAR: functional annotation of genetic variants from high-throughput sequencing data. *Nucleic Acids Res* **38**, e164 (2010).
6. Martincorena, I., *et al.* High burden and pervasive positive selection of somatic mutations in normal human skin. *Science* **348**, 880-886 (2015).
7. Flanagan, S.E., Patch, A.-M. & Ellard, S. Using SIFT and PolyPhen to predict loss-of-function and gain-of-function mutations. *Genetic testing and molecular biomarkers* **14**, 533-537 (2010).
8. White, I.R., Royston, P. & Wood, A.M. Multiple imputation using chained equations: issues and guidance for practice. *Statistics in medicine* **30**, 377-399 (2011).
